# Supplementary material
Source: PubMed Central journal article supplement (PMC3653377)
Supplement: Supp_Fig1.pdf [file Supp_Fig1.pdf]

## Supplementary Data

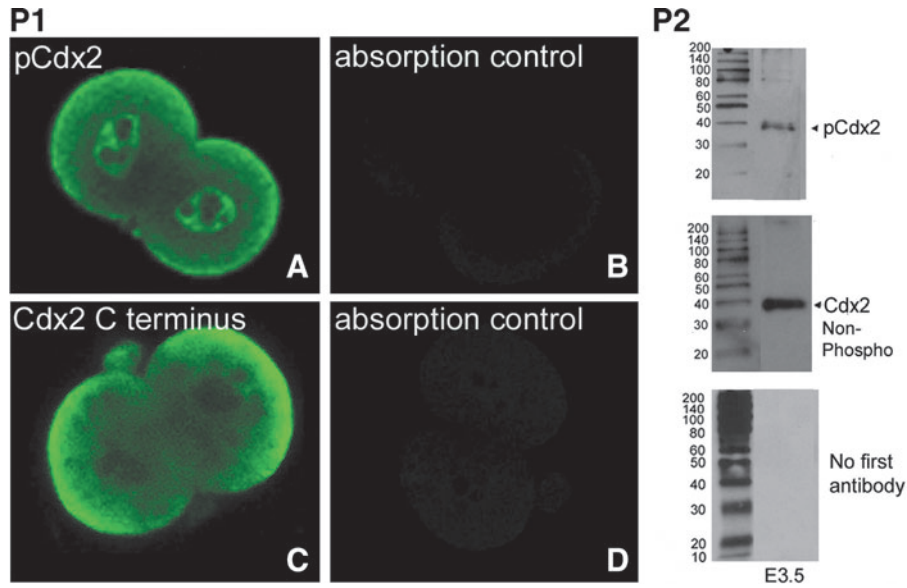

**SUPPLEMENTARY FIG. S1.** *Part 1:* Caudal-related homeobox protein 2 (Cdx2) phospho ser60 and Cdx2 C terminus total protein antibodies detect epitopes in E1.5 embryos, but this is completely ablated after coincubation with 100-fold excess of immunizing peptide. E1.5 two-cell stage embryos were isolated, fixed, permeabilized, and stained with Cdx2 phospho ser60 or Cdx2 C terminus antibodies alone [(A, C), respectively], or coincubated with 100-fold excess of immunizing peptides [(B, D), respectively]. *Part 2:* E3.5 blastocysts were lysed, fractionated on sodium dodecyl sulfate–polyacrylamide gel electrophoresis gels and probed with antibodies to Cdx2 phospho ser60, Cdx2 nonphospho ser60, and no antibody from *top* to *bottom*.
